# Supplementary figures and images for: Looking beyond Virus Detection in RNA Sequencing Data: Lessons Learned from a Community-Based Effort to Detect Cellular Plant Pathogens and Pests
Source: MDPI journal article supplement (doi:10.3390/plants12112139), 2023-05-29

Participant

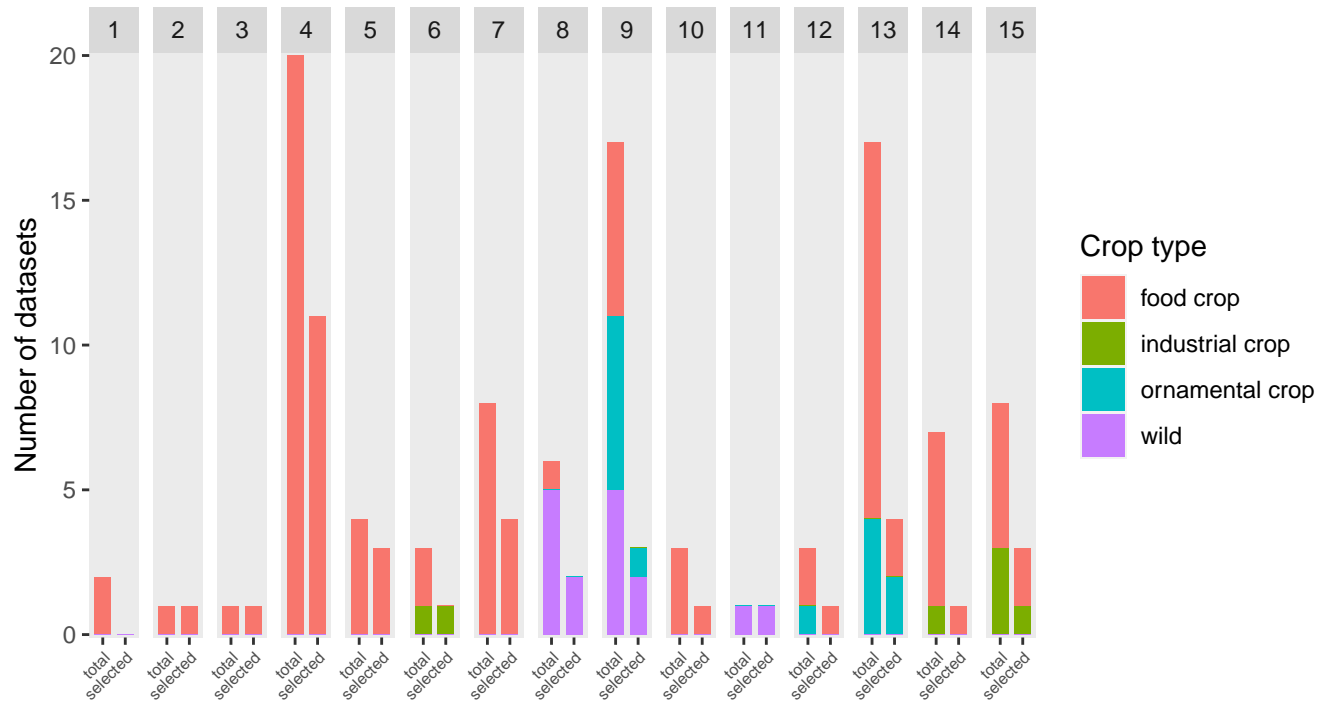

Supplement: s1 [file s1]
